# Supplementary material for: A library of chemically defined human N-glycans synthesized from microbial oligosaccharide precursors
Source: PubMed Central journal article supplement (PMC5698433; doi:10.1038/s41598-017-15891-8), 2017-11-21
Supplement: 41598_2017_15891_MOESM1_ESM.pdf [file 41598_2017_15891_MOESM1_ESM.pdf]

## **Supplementary Information File**

### **A library of chemically defined human *N*-glycans synthesized from microbial oligosaccharide precursors**

Brian S. Hamilton, Joshua D. Wilson, Marina A. Shumakovich, Adam C. Fisher, James C. Brooks, Alyssa Pontes, Radnaa Naran, Christian Heiss, Chao Gao, Robert Kardish, Jamie Heimburg-Molinaro, Parastoo Azadi, Richard D. Cummings, Judith H. Merritt, and Matthew P. DeLisa

**Supplementary Table 1. N-glycan structures produced in this study**

| Glycan Number | Symbolic Representation                                                             | Structure                                                                                                                                                                       |
|---------------|-------------------------------------------------------------------------------------|---------------------------------------------------------------------------------------------------------------------------------------------------------------------------------|
| 2             | 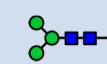   | Man $\alpha$ 1-6(Man $\alpha$ 1-3)Man $\beta$ 1-4GlcNAc $\beta$ 1-4GlcNAc                                                                                                       |
| 3             |    | Man $\alpha$ 1-6(Man $\alpha$ 1-2Man $\alpha$ 1-2Man $\alpha$ 1-3)Man $\beta$ 1-4GlcNAc $\beta$ 1-4GlcNAc                                                                       |
| 4             |    | Man $\alpha$ 1-6(Man $\alpha$ 1-3)Man $\alpha$ 1-6(Man $\alpha$ 1-3)Man $\beta$ 1-4GlcNAc $\beta$ 1-4GlcNAc                                                                     |
| 5             |    | Man $\beta$ 1-4GlcNAc $\beta$ 1-4GlcNAc                                                                                                                                         |
| 6             |    | Man $\alpha$ 1-6(Man $\alpha$ 1-3)Man $\alpha$ 1-6(GlcNAc $\beta$ 1-2Man $\alpha$ 1-3)Man $\beta$ 1-4GlcNAc $\beta$ 1-4GlcNAc                                                   |
| 7             |    | Man $\alpha$ 1-6(Man $\alpha$ 1-3)Man $\alpha$ 1-6(GlcNAc $\beta$ 1-2(GlcNAc $\beta$ 1-4)Man $\alpha$ 1-3)Man $\beta$ 1-4GlcNAc $\beta$ 1-4GlcNAc                               |
| 8             |    | Man $\alpha$ 1-6(Man $\alpha$ 1-3)Man $\alpha$ 1-6(Gal $\beta$ 1-4GlcNAc $\beta$ 1-2Man $\alpha$ 1-3)Man $\beta$ 1-4GlcNAc $\beta$ 1-4GlcNAc                                    |
| 9             |    | Man $\alpha$ 1-6(Man $\alpha$ 1-3)Man $\alpha$ 1-6(Gal $\beta$ 1-4GlcNAc $\beta$ 1-2(Gal $\beta$ 1-4GlcNAc $\beta$ 1-4)Man $\alpha$ 1-3)Man $\beta$ 1-4GlcNAc $\beta$ 1-4GlcNAc |
| 10            |   | Man $\alpha$ 1-6(Gal $\beta$ 1-4GlcNAc $\beta$ 1-2Man $\alpha$ 1-3)Man $\beta$ 1-4GlcNAc $\beta$ 1-4GlcNAc                                                                      |
| 11            |  | Man $\alpha$ 1-6(GlcNAc $\beta$ 1-2Man $\alpha$ 1-3)Man $\beta$ 1-4GlcNAc $\beta$ 1-4GlcNAc                                                                                     |
| 12            |  | Man $\alpha$ 1-6(GlcNAc $\beta$ 1-2(GlcNAc $\beta$ 1-4)Man $\alpha$ 1-3)Man $\beta$ 1-4GlcNAc $\beta$ 1-4GlcNAc                                                                 |
| 13            |  | GlcNAc $\beta$ 1-2(GlcNAc $\beta$ 1-6)Man $\alpha$ 1-6(GlcNAc $\beta$ 1-2Man $\alpha$ 1-3)Man $\beta$ 1-4GlcNAc $\beta$ 1-4GlcNAc                                               |
| 14            |  | GlcNAc $\beta$ 1-2Man $\alpha$ 1-6(GlcNAc $\beta$ 1-2Man $\alpha$ 1-3)Man $\beta$ 1-4GlcNAc $\beta$ 1-4GlcNAc                                                                   |
| 15            |  | Man $\alpha$ 1-6(Gal $\beta$ 1-4GlcNAc $\beta$ 1-2(Gal $\beta$ 1-4GlcNAc $\beta$ 1-4)Man $\alpha$ 1-3)Man $\beta$ 1-4GlcNAc $\beta$ 1-4GlcNAc                                   |
| 16            |  | Gal $\beta$ 1-4GlcNAc $\beta$ 1-2Man $\alpha$ 1-6(Gal $\beta$ 1-4GlcNAc $\beta$ 1-2(Gal $\beta$ 1-4GlcNAc $\beta$ 1-4)Man $\alpha$ 1-3)Man $\beta$ 1-4GlcNAc $\beta$ 1-4GlcNAc  |
| 17            |  | GlcNAc $\beta$ 1-2Man $\alpha$ 1-6(GlcNAc $\beta$ 1-2(GlcNAc $\beta$ 1-4)Man $\alpha$ 1-3)Man $\beta$ 1-4GlcNAc $\beta$ 1-4GlcNAc                                               |
| 18            |  | GlcNAc $\beta$ 1-2Man $\alpha$ 1-6(GlcNAc $\beta$ 1-2Man $\alpha$ 1-3)(GlcNAc $\beta$ 1-4)Man $\beta$ 1-4GlcNAc $\beta$ 1-4GlcNAc                                               |
| 19            |  | Gal $\beta$ 1-4GlcNAc $\beta$ 1-2Man $\alpha$ 1-6(Gal $\beta$ 1-4GlcNAc $\beta$ 1-2Man $\alpha$ 1-3)Man $\beta$ 1-4GlcNAc $\beta$ 1-4GlcNAc                                     |
| 20            |  | GlcNAc $\beta$ 1-2(GlcNAc $\beta$ 1-6)Man $\alpha$ 1-6(GlcNAc $\beta$ 1-2(GlcNAc $\beta$ 1-4)Man $\alpha$ 1-3)Man $\beta$ 1-4GlcNAc $\beta$ 1-4GlcNAc                           |
| 21            |  | GlcNAc $\beta$ 1-2Man $\alpha$ 1-6(GlcNAc $\beta$ 1-2(GlcNAc $\beta$ 1-4)Man $\alpha$ 1-3)(GlcNAc $\beta$ 1-4)Man $\beta$ 1-4GlcNAc $\beta$ 1-4GlcNAc                           |

**Supplementary Table 2.** Chemical shift assignments of the synthesized *N*-linked oligosaccharides

|                   | 2                                                                                 | 3                                                                                 | 4                                                                                 | 5                                                                                 | 6                                                                                  | 7                                                                                   | 8                                                                                   | 9                                                                                   | 10                                                                                  | 11                                                                                  |
|-------------------|-----------------------------------------------------------------------------------|-----------------------------------------------------------------------------------|-----------------------------------------------------------------------------------|-----------------------------------------------------------------------------------|------------------------------------------------------------------------------------|-------------------------------------------------------------------------------------|-------------------------------------------------------------------------------------|-------------------------------------------------------------------------------------|-------------------------------------------------------------------------------------|-------------------------------------------------------------------------------------|
| <b>Residue</b>    | 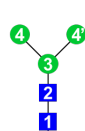 |  |  |  |  |  |  |  |  |  |
| GlcNAc-1 $\alpha$ | 5.16                                                                              | 5.17                                                                              | 5.16                                                                              | 5.17                                                                              | 5.14                                                                               | 5.15                                                                                | 5.15                                                                                | 5.16                                                                                | 5.16                                                                                | 5.15                                                                                |
| GlcNAc-1 $\beta$  | 4.67                                                                              | 4.67                                                                              | 4.67                                                                              | 4.67                                                                              | 4.65                                                                               | 4.66                                                                                | 4.66                                                                                | 4.66                                                                                | 4.67                                                                                | 4.65                                                                                |
| GlcNAc-2          | 4.58                                                                              | 4.58                                                                              | 4.57                                                                              | 4.57                                                                              | 4.55                                                                               | 4.56                                                                                | 4.55                                                                                | 4.56                                                                                | 4.58                                                                                | 4.57                                                                                |
| Man-3             | 4.76                                                                              | 4.75                                                                              | 4.75                                                                              | 4.59                                                                              | 4.75                                                                               | 4.75                                                                                | 4.75                                                                                | 4.75                                                                                | 4.75                                                                                | 4.75                                                                                |
| Man-4             | 5.08                                                                              | 5.32                                                                              | 5.06                                                                              | -                                                                                 | 5.08                                                                               | 5.07                                                                                | 5.08                                                                                | 5.08                                                                                | 5.07                                                                                | 5.08                                                                                |
| Man-4'            | 4.89                                                                              | 4.89                                                                              | 4.84                                                                              | -                                                                                 | 4.84                                                                               | 4.84                                                                                | 4.84                                                                                | 4.84                                                                                | 4.87                                                                                | 4.88                                                                                |
| Man-A             | -                                                                                 | -                                                                                 | 5.06                                                                              | -                                                                                 | 5.06                                                                               | 5.05                                                                                | 5.06                                                                                | 5.06                                                                                | -                                                                                   | -                                                                                   |
| Man-B             | -                                                                                 | -                                                                                 | 4.88                                                                              | -                                                                                 | 4.88                                                                               | 4.87                                                                                | 4.88                                                                                | 4.88                                                                                | -                                                                                   | -                                                                                   |
| Man-C             | -                                                                                 | 5.28                                                                              | -                                                                                 | -                                                                                 | -                                                                                  | -                                                                                   | -                                                                                   | -                                                                                   | -                                                                                   | -                                                                                   |
| Man-D             | -                                                                                 | 5.02                                                                              | -                                                                                 | -                                                                                 | -                                                                                  | -                                                                                   | -                                                                                   | -                                                                                   | -                                                                                   | -                                                                                   |
| GlcNAc-5          | -                                                                                 | -                                                                                 | -                                                                                 | -                                                                                 | 4.53                                                                               | 4.52                                                                                | 4.54                                                                                | 4.54                                                                                | 4.54                                                                                | 4.52                                                                                |
| GlcNAc-5'         | -                                                                                 | -                                                                                 | -                                                                                 | -                                                                                 | -                                                                                  | -                                                                                   | -                                                                                   | -                                                                                   | -                                                                                   | -                                                                                   |
| Gal-6             | -                                                                                 | -                                                                                 | -                                                                                 | -                                                                                 | -                                                                                  | -                                                                                   | 4.44                                                                                | 4.44                                                                                | 4.43                                                                                | -                                                                                   |
| GlcNAc-7          | -                                                                                 | -                                                                                 | -                                                                                 | -                                                                                 | -                                                                                  | 4.50                                                                                | -                                                                                   | 4.52                                                                                | -                                                                                   | -                                                                                   |
| Gal-8             | -                                                                                 | -                                                                                 | -                                                                                 | -                                                                                 | -                                                                                  | -                                                                                   | -                                                                                   | 4.43                                                                                | -                                                                                   | -                                                                                   |

**Table 1. H1 chemical shifts.** Glycans 2, 3, 5, 10-21 were analyzed at 25°C using a Varian Inova 600-MHz spectrometer (Complex Carbohydrate Research Center) with a cryoprobe. Glycans 4, and 6-9 were analyzed at 25°C using a Varian Inova 600-MHz spectrometer (Cornell) with a pulse field gradient probe. To calibrate spectra, HOD peak was set to  $\delta_{\text{H}} = 4.77$  ppm.

Supplementary Table 2. (continued)

|                   | 12                                                                                | 13                                                                                | 14                                                                                | 15                                                                                | 16                                                                                 | 17                                                                                  | 18                                                                                  | 19                                                                                  | 20                                                                                  | 21                                                                                  |
|-------------------|-----------------------------------------------------------------------------------|-----------------------------------------------------------------------------------|-----------------------------------------------------------------------------------|-----------------------------------------------------------------------------------|------------------------------------------------------------------------------------|-------------------------------------------------------------------------------------|-------------------------------------------------------------------------------------|-------------------------------------------------------------------------------------|-------------------------------------------------------------------------------------|-------------------------------------------------------------------------------------|
| <b>Residue</b>    | 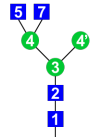 |  |  |  |  |  |  |  |  |  |
| GlcNAc-1 $\alpha$ | 5.15                                                                              | 5.17                                                                              | 5.17                                                                              | 5.17                                                                              | 5.17                                                                               | 5.17                                                                                | 5.16                                                                                | 5.17                                                                                | 5.17                                                                                | 5.17                                                                                |
| GlcNAc-1 $\beta$  | 4.67                                                                              | 4.67                                                                              | 4.67                                                                              | 4.68                                                                              | 4.67                                                                               | 4.68                                                                                | 4.67                                                                                | 4.67                                                                                | 4.67                                                                                | 4.66                                                                                |
| GlcNAc-2          | 4.57                                                                              | 4.58                                                                              | 4.57                                                                              | 4.58                                                                              | 4.58                                                                               | 4.58                                                                                | 4.58                                                                                | 4.59                                                                                | 4.58                                                                                | 4.58                                                                                |
| Man-3             | 4.75                                                                              | 4.75                                                                              | <sup>1</sup> n.d.                                                                 | <sup>1</sup> n.d.                                                                 | <sup>1</sup> n.d.                                                                  | <sup>1</sup> n.d.                                                                   | 4.67                                                                                | 4.75                                                                                | 4.74                                                                                | 4.66                                                                                |
| Man-4             | 5.08                                                                              | 5.1                                                                               | 5.09                                                                              | 5.09                                                                              | 5.09                                                                               | 5.09                                                                                | 5.04                                                                                | 5.1                                                                                 | 5.1                                                                                 | 5.03                                                                                |
| Man-4'            | 4.88                                                                              | 4.84                                                                              | 4.9                                                                               | 4.89                                                                              | 4.89                                                                               | 4.89                                                                                | 4.98                                                                                | 4.91                                                                                | 4.84                                                                                | 4.98                                                                                |
| GlcNAc-5          | 4.52                                                                              | 4.54                                                                              | 4.54                                                                              | 4.55                                                                              | 4.53                                                                               | 4.53                                                                                | 4.53                                                                                | 4.56                                                                                | 4.55                                                                                | 4.5                                                                                 |
| GlcNAc-5'         | -                                                                                 | 4.51                                                                              | 4.54                                                                              | 4.53                                                                              | 4.57                                                                               | 4.51                                                                                | 4.53                                                                                | 4.56                                                                                | 4.54                                                                                | 4.53                                                                                |
| Gal-6             | -                                                                                 | -                                                                                 | -                                                                                 | 4.45                                                                              | 4.44                                                                               | -                                                                                   | -                                                                                   | 4.45                                                                                | -                                                                                   | -                                                                                   |
| Gal-6'            | -                                                                                 | -                                                                                 | -                                                                                 | -                                                                                 | 4.44                                                                               | -                                                                                   | -                                                                                   | 4.45                                                                                | -                                                                                   | -                                                                                   |
| GlcNAc-7          | 4.49                                                                              | -                                                                                 | -                                                                                 | -                                                                                 | 4.51                                                                               | 4.54                                                                                | -                                                                                   | -                                                                                   | 4.51                                                                                | 4.53                                                                                |
| GlcNAc-7'         | -                                                                                 | 4.54                                                                              | -                                                                                 | -                                                                                 | -                                                                                  | -                                                                                   | -                                                                                   | -                                                                                   | 4.51                                                                                | -                                                                                   |
| Gal-8             | -                                                                                 | -                                                                                 | -                                                                                 | 4.43                                                                              | 4.45                                                                               | -                                                                                   | -                                                                                   | -                                                                                   | -                                                                                   | -                                                                                   |
| GlcNAc-9          | -                                                                                 | -                                                                                 | -                                                                                 | -                                                                                 | -                                                                                  | -                                                                                   | 4.44                                                                                | -                                                                                   | -                                                                                   | 4.44                                                                                |

<sup>1</sup>n.d. - anomeric signal for Man3 overlaps with HOD peak at 25°C and is not visible in some proton spectra.

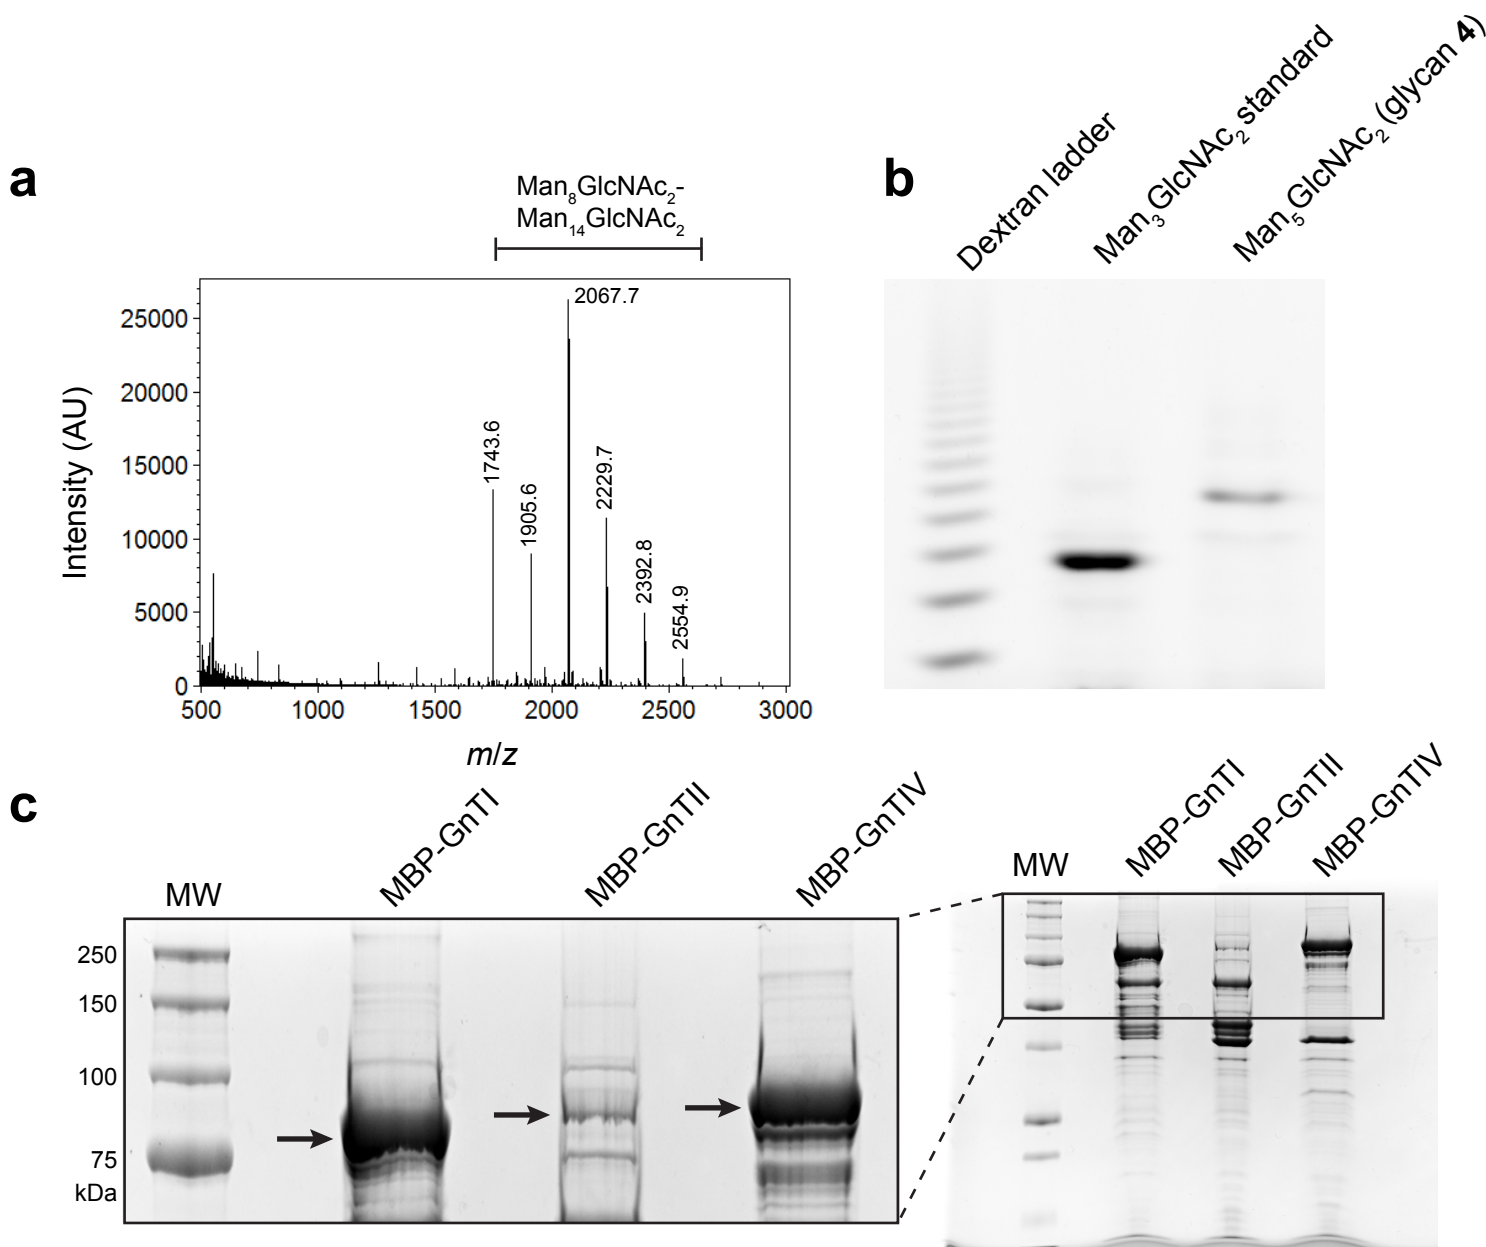

**Supplementary Figure 1. MS and FACE analysis of yeast invertase-derived precursor oligosaccharides.** (a) MALDI-TOF MS analysis of high-mannose oligosaccharides liberated from invertase by PNGase F. The predominant peak at 2067.7 *m/z* corresponds to Man<sub>10</sub>GlcNAc<sub>2</sub>. (b) FACE gel analysis of Man<sub>5</sub>GlcNAc<sub>2</sub> produced by enzymatic deglycosylation of the oligosaccharide mixture shown in (a) demonstrates homogeneity and purity of glycan product. Commercially available Man<sub>3</sub>GlcNAc<sub>2</sub> was used as a standard for quantification. (c) SDS-PAGE gel of fusion proteins comprised of the *E. coli* maltose-binding protein (MBP) and one of the following: *N. tabacum* GnTI, *H. sapiens* GnTII, or *B. taurus* GnTIV either GnTI, GnTII, or GnTIV, as indicated. All fusion proteins were expressed in *E. coli* Origami2(DE3) cells and purified by amylose affinity chromatography. Molecular weight (MW) ladder is shown at the left. Uncropped version of the SDS-PAGE gel is shown at the right, with the cropped section marked by the box.

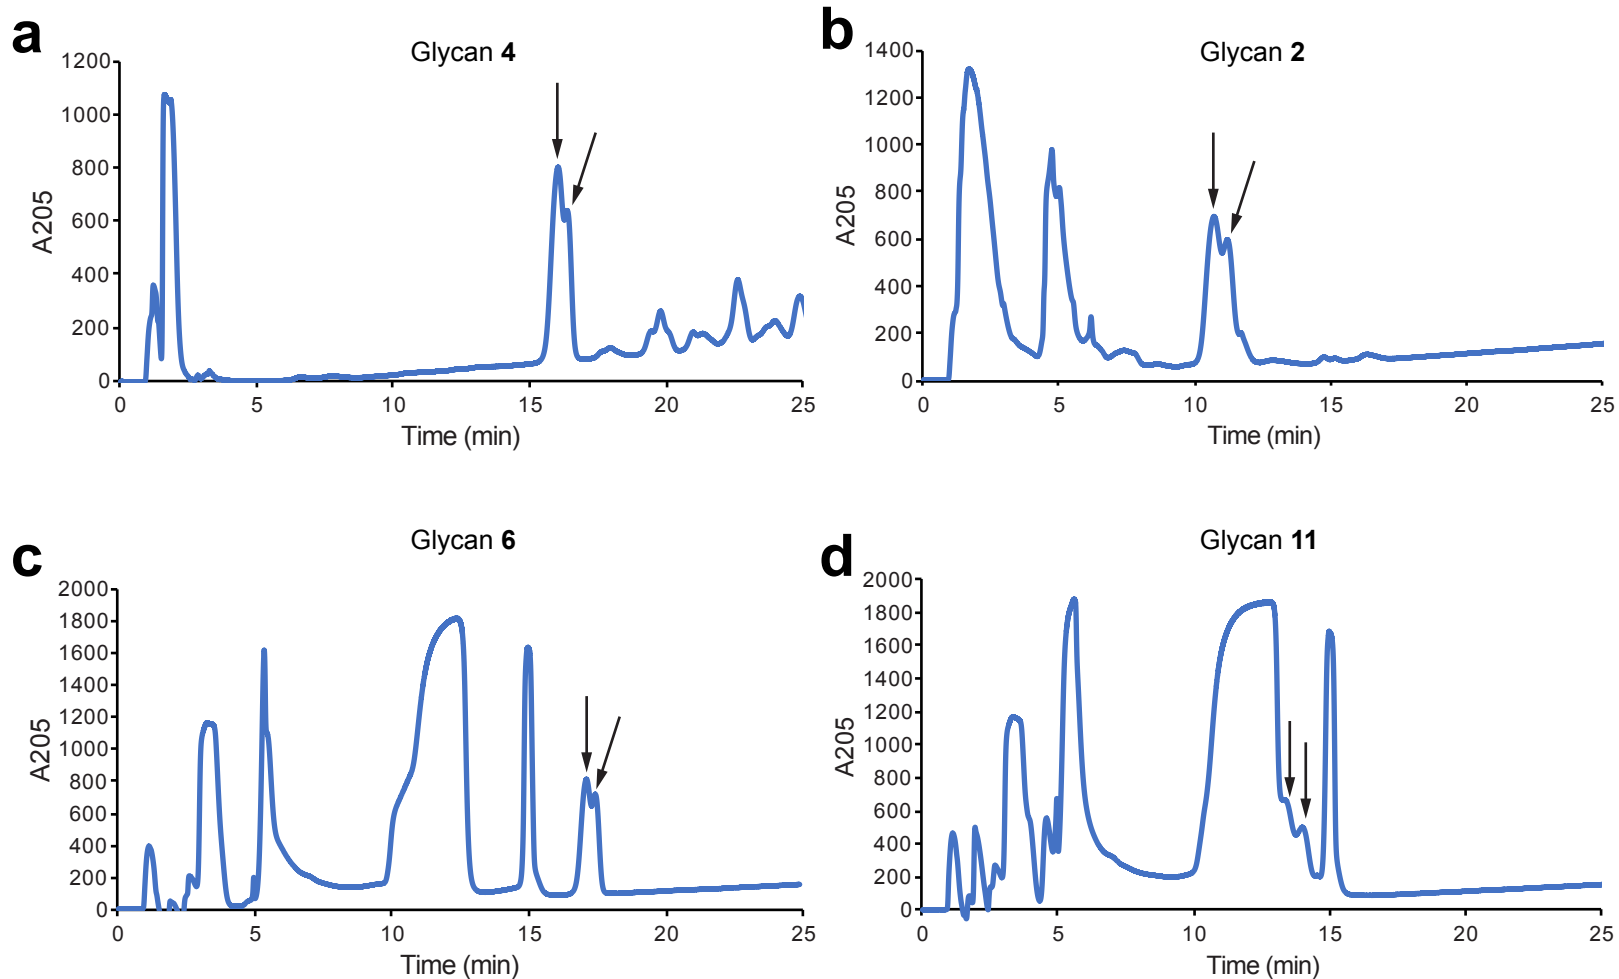

**Supplementary Figure 2. Representative HPLC analysis of glycan precursors and products.** (a) Partially purified glycan **4** (~150 mg isolated from invertase as described in the experimental procedures) was resuspended in 33% water, 67% acetonitrile, and resolved using a Waters XBridge BEH Amide column (130 Å, 5 µm, 4.6 mm X 100 mm). After an initial 5 min at 30% 20 mM ammonium formate in water, 70% acetonitrile, a linear gradient was run to 50% 20 mM ammonium formate in water, 50% acetonitrile over 20 min at room temp. Elution was monitored by absorbance at 205 nm, and fractions (~1.5 mL each) were analyzed by MALDI-TOF MS to verify the presence of glycan. This glycan eluted as a doublet with peaks at 16.0 and 16.4 min. Peaks eluting later in the gradient were high mannose contaminants as confirmed by MALDI-TOF MS. (b) Approximately 200 µg of dried glycan **2** (isolated from LLOs as described in the experimental procedures) was subjected to HPLC as described above. Glycan **2** eluted as a doublet, corresponding to alpha and beta anomers, with peaks at 10.7 and 11.2 min. (c) Glycan **6** was produced by subjecting HPLC-purified glycan **4** to an overnight reaction as described in the experimental procedures. The glycan **6** reaction was dried and subjected to HPLC as described above. This glycan eluted as a doublet with peaks at 17.1 and 17.4 min, making it well resolved from contaminant peaks and glycan **4**. (d) Glycan **11** was produced by subjecting HPLC-purified glycan **2** to an overnight reaction as described in the experimental procedures. The glycan **11** reaction was dried and subjected to HPLC as described for glycan **2**. Glycan **11** eluted as a doublet with peaks at 13.3 and 14.0 min. The shift in the elution time indicates addition of GlcNAc to glycan **2**; however, the assessment of precursor glycan **2** is prevented by overlap with the tail of a large peak corresponding to untreated UDP-GlcNAc. Doublet peaks corresponding to the glycan of interest are marked with arrows in each trace.

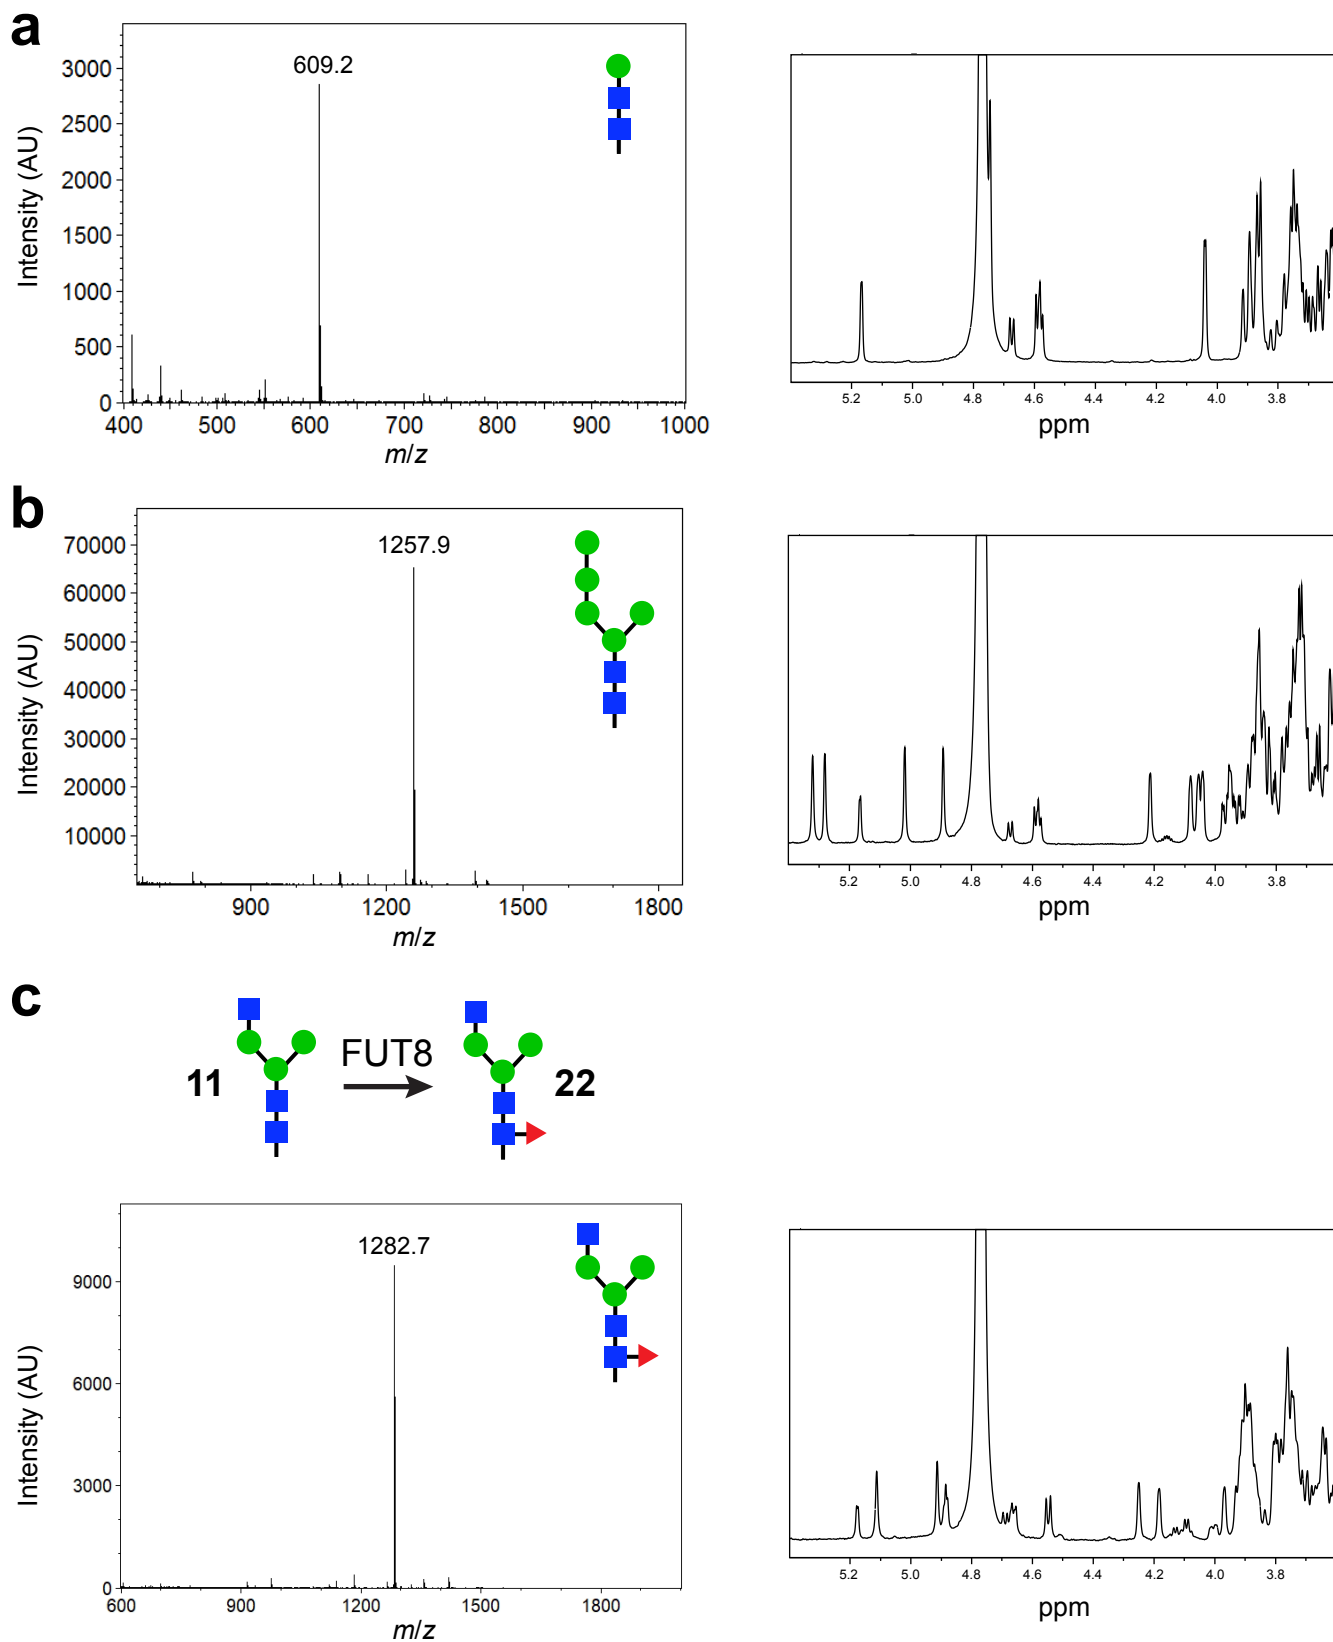

**Supplementary Figure 3. Preparation of alternative precursor oligosaccharides for enzymatic remodeling.** MALDI-TOF MS analysis (left panels) and 600-MHz  $^1\text{H}$  NMR characterization (right panels) corresponding to: (a)  $\text{Man}_1\text{GlcNAc}_2$  glycan synthesized by enzymatic deglycosylation of *S. cerevisiae* oligosaccharides; (b) the  $\text{Man}_5\text{GlcNAc}_2$  glycan synthesized by glycoengineered *E. coli* cells; and (c) glycan 22, a fucosylated version of 11 generated by treatment with human FUT8 (R&D Systems), a commercially available  $\alpha$ 1,6-fucosyltransferase, in the presence of its natural donor substrate GDP-fucose.

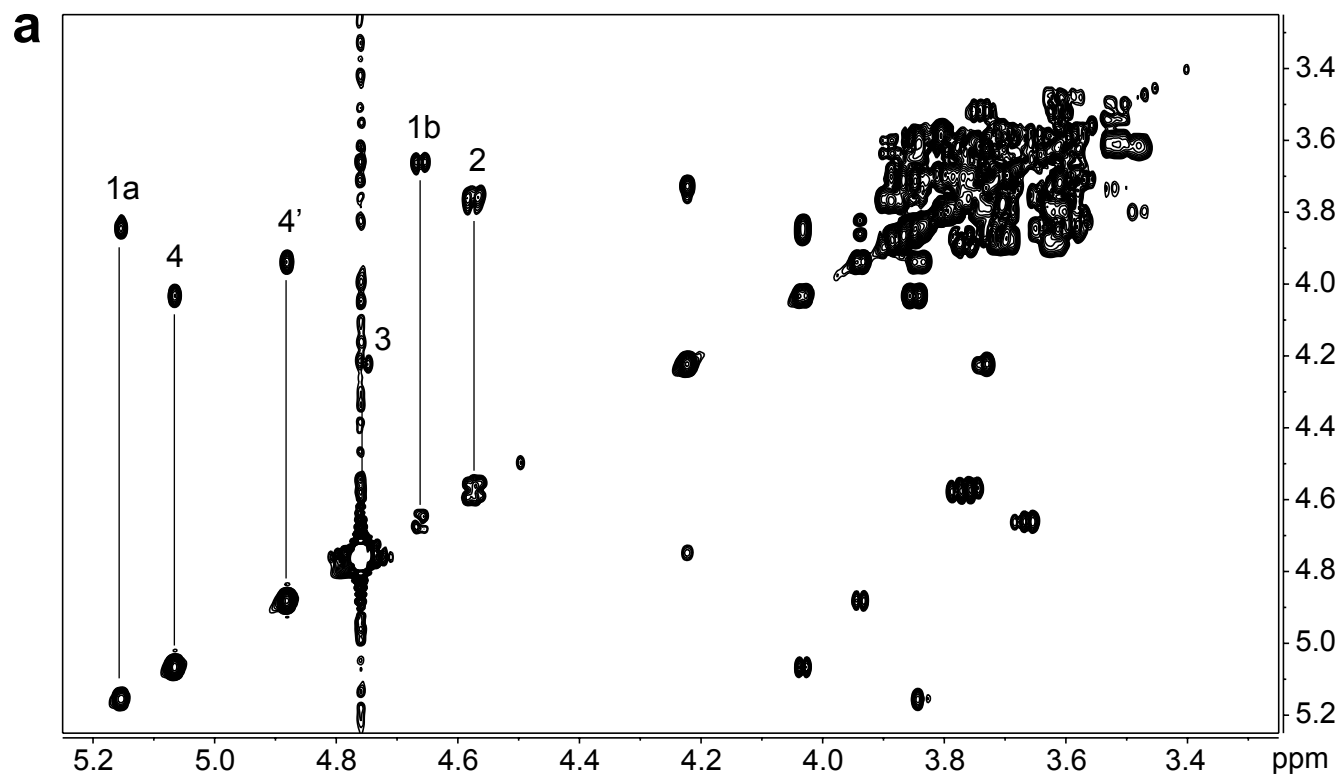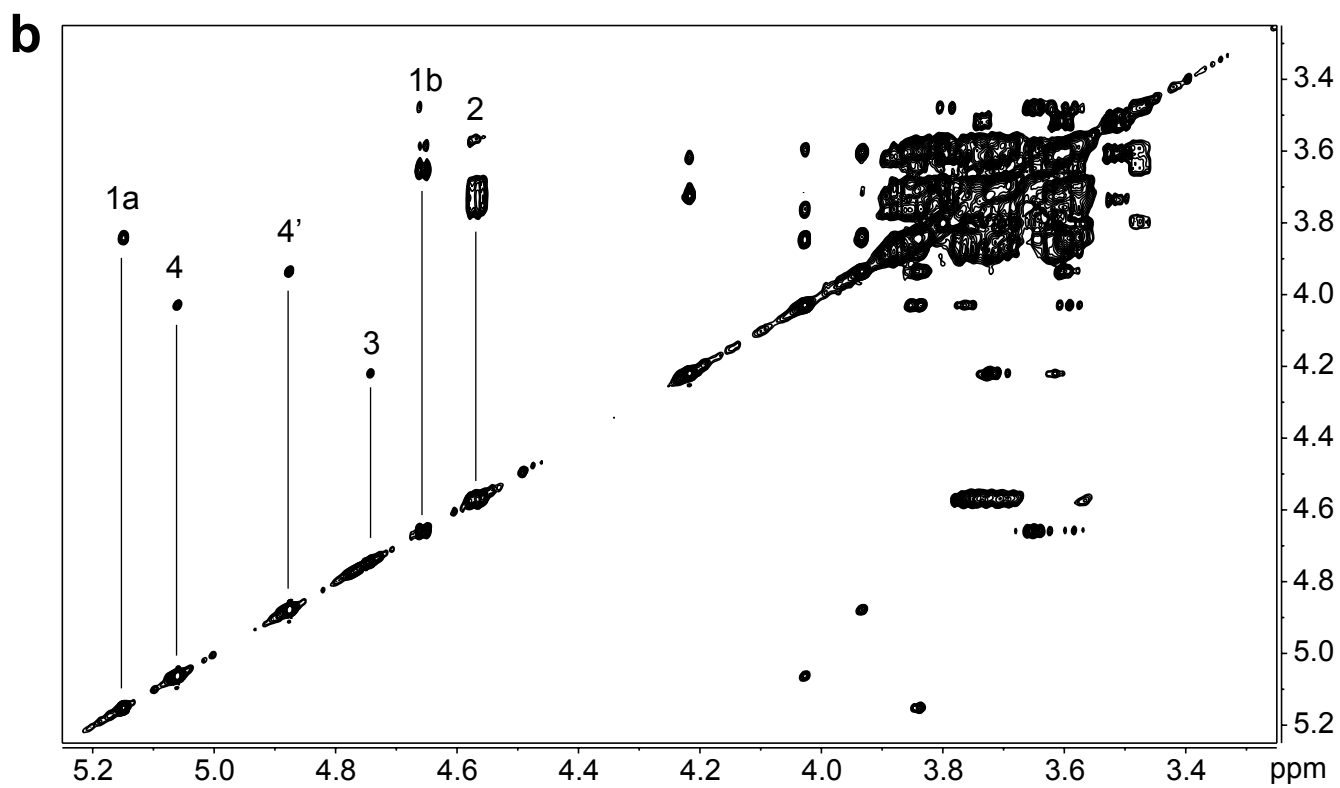

**Supplementary Figure 4.** (a) Partial  $^1\text{H}$ - $^1\text{H}$ -gradient COSY NMR spectrum of glycan **2**, acquired at 600 MHz and 25°C. Only the H1-H2-correlations are labeled for clarity. (b) Partial  $^1\text{H}$ - $^1\text{H}$ -zTOCSY NMR spectrum of glycan **2**, acquired at 600 MHz and 25°C. Only the correlations with H1 are labeled.



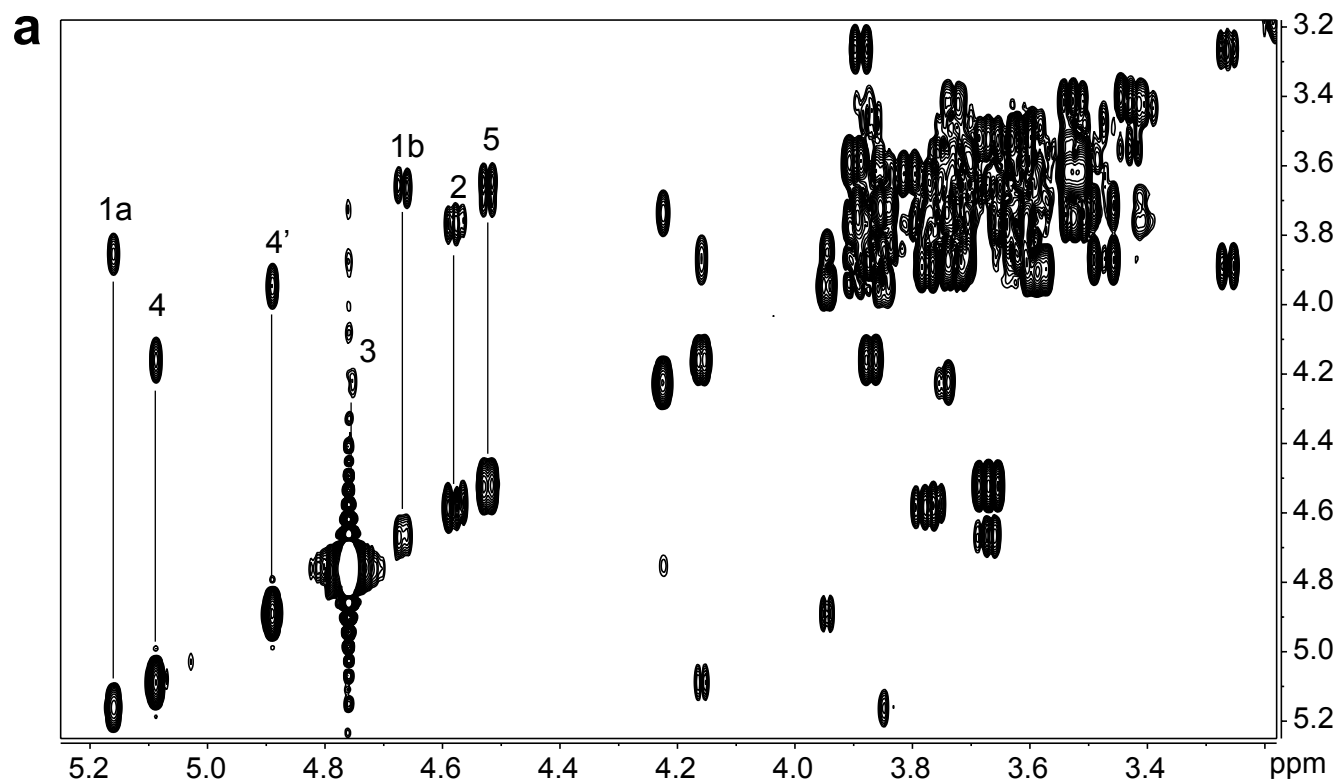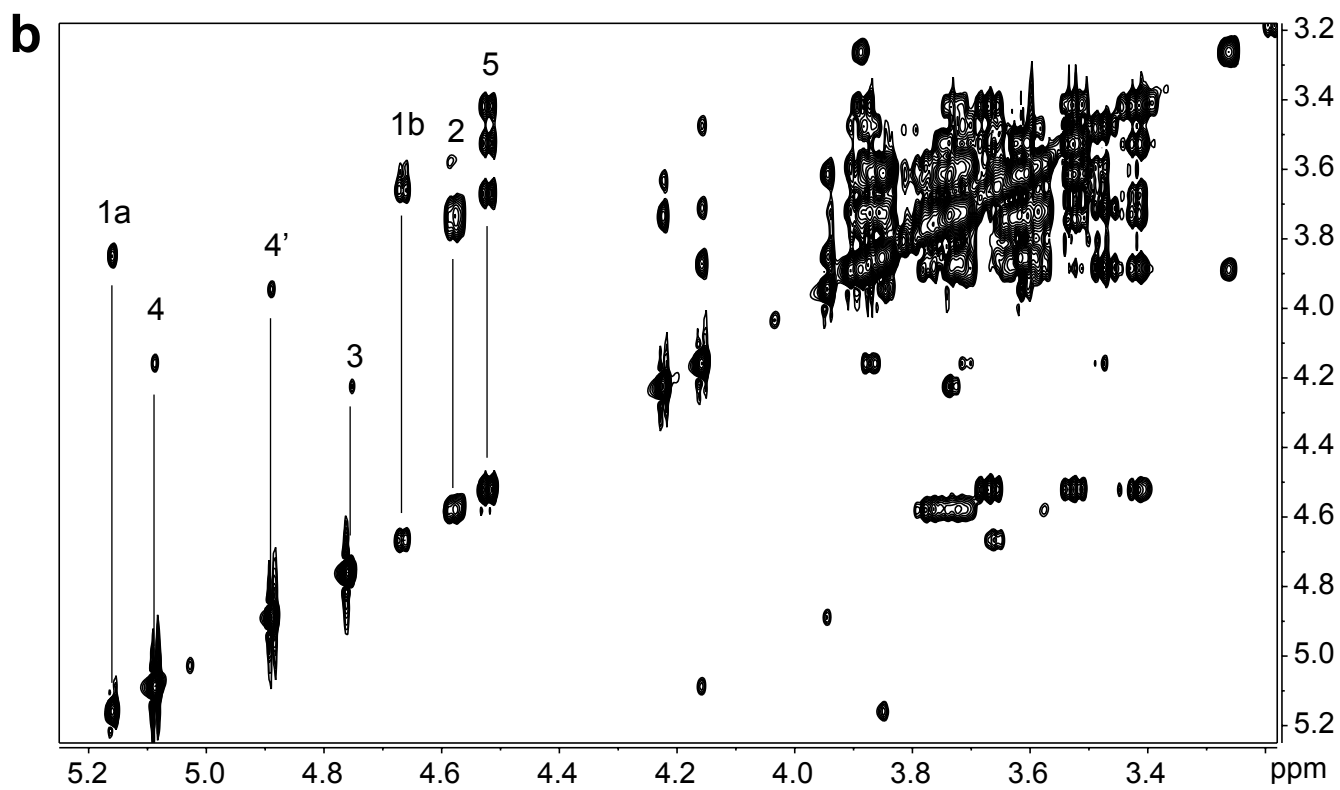

**Supplementary Figure 5.** (a) Partial  $^1\text{H}$ - $^1\text{H}$ -gradient COSY NMR spectrum of glycan **11**, acquired at 600 MHz and 25°C. Only the H1-H2-correlations are labeled. (b) Partial  $^1\text{H}$ - $^1\text{H}$ -zTOCSY NMR spectrum of glycan **11**, acquired at 600 MHz and 25°C. Only the correlations with H1 are labeled.

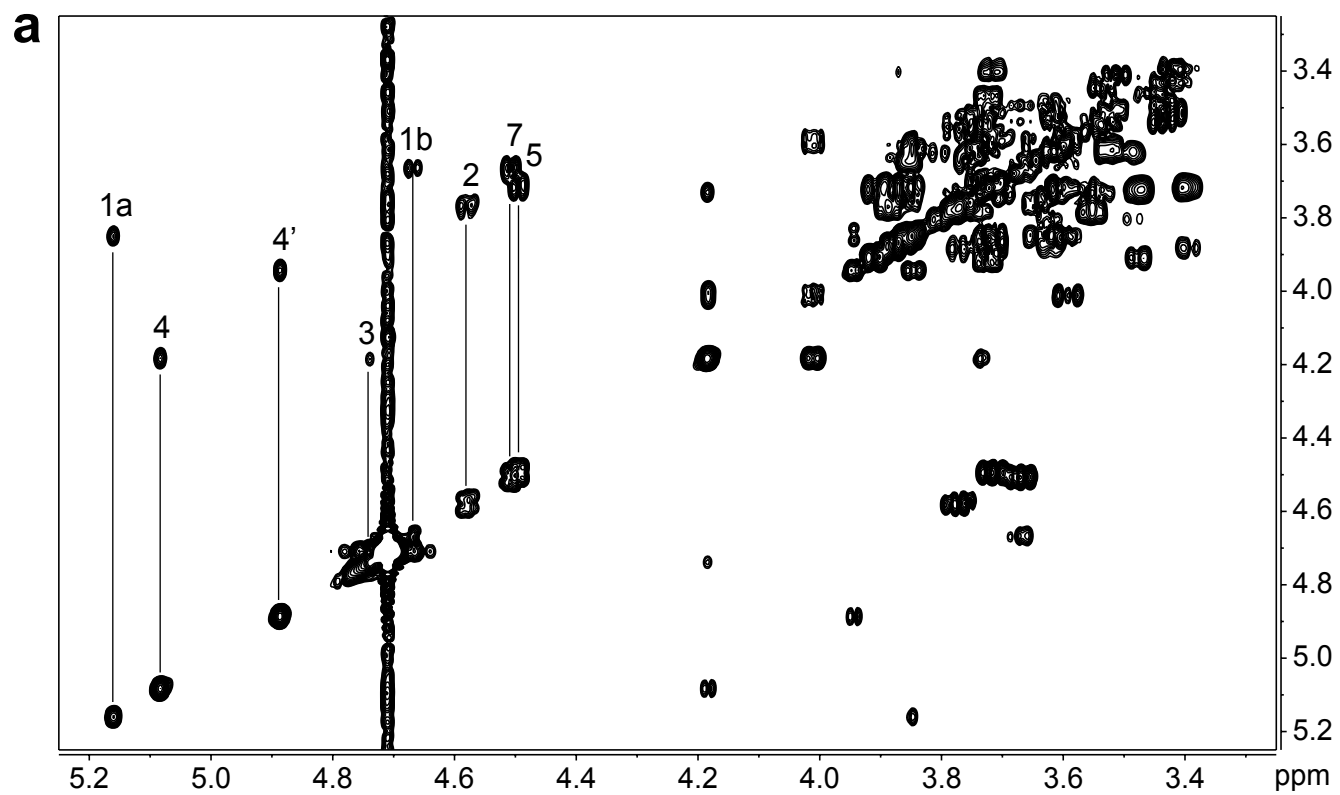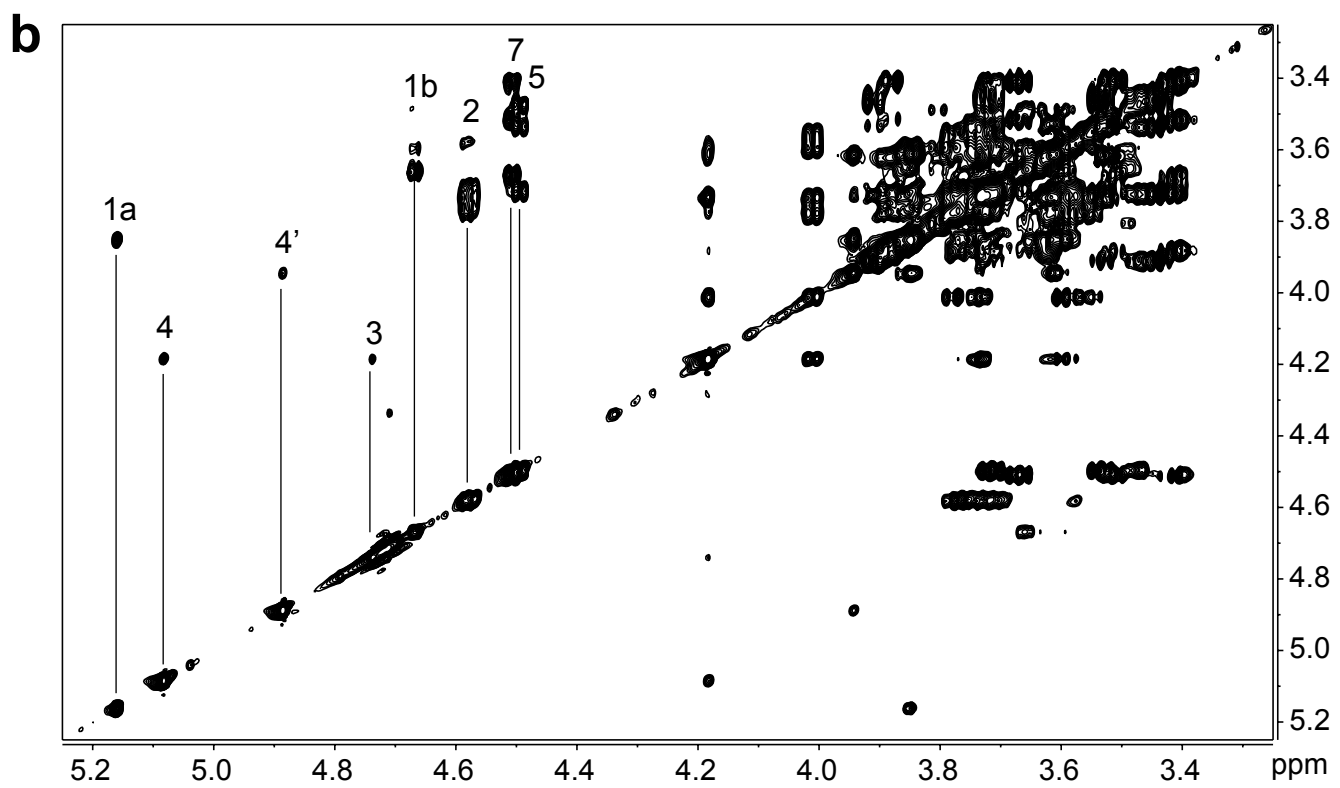

**Supplementary Figure 6.** (a) Partial  $^1\text{H}$ - $^1\text{H}$ -gradient COSY NMR spectrum of glycan **12**, acquired at 600 MHz and 30°C. Only the H1-H2-correlations are labeled. (b) Partial  $^1\text{H}$ - $^1\text{H}$ -zTOCSY NMR spectrum of glycan **12**, acquired at 600 MHz and 30°C. Only the correlations with H1 are labeled.

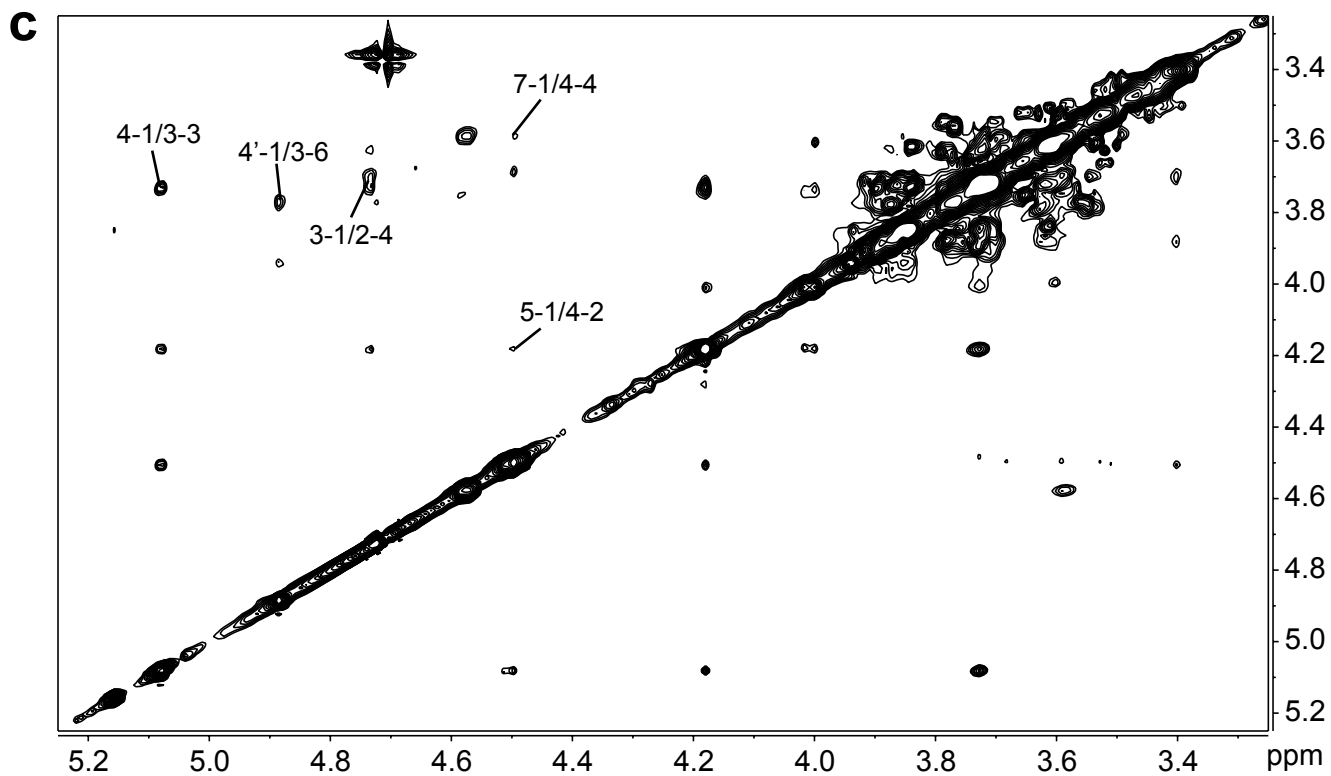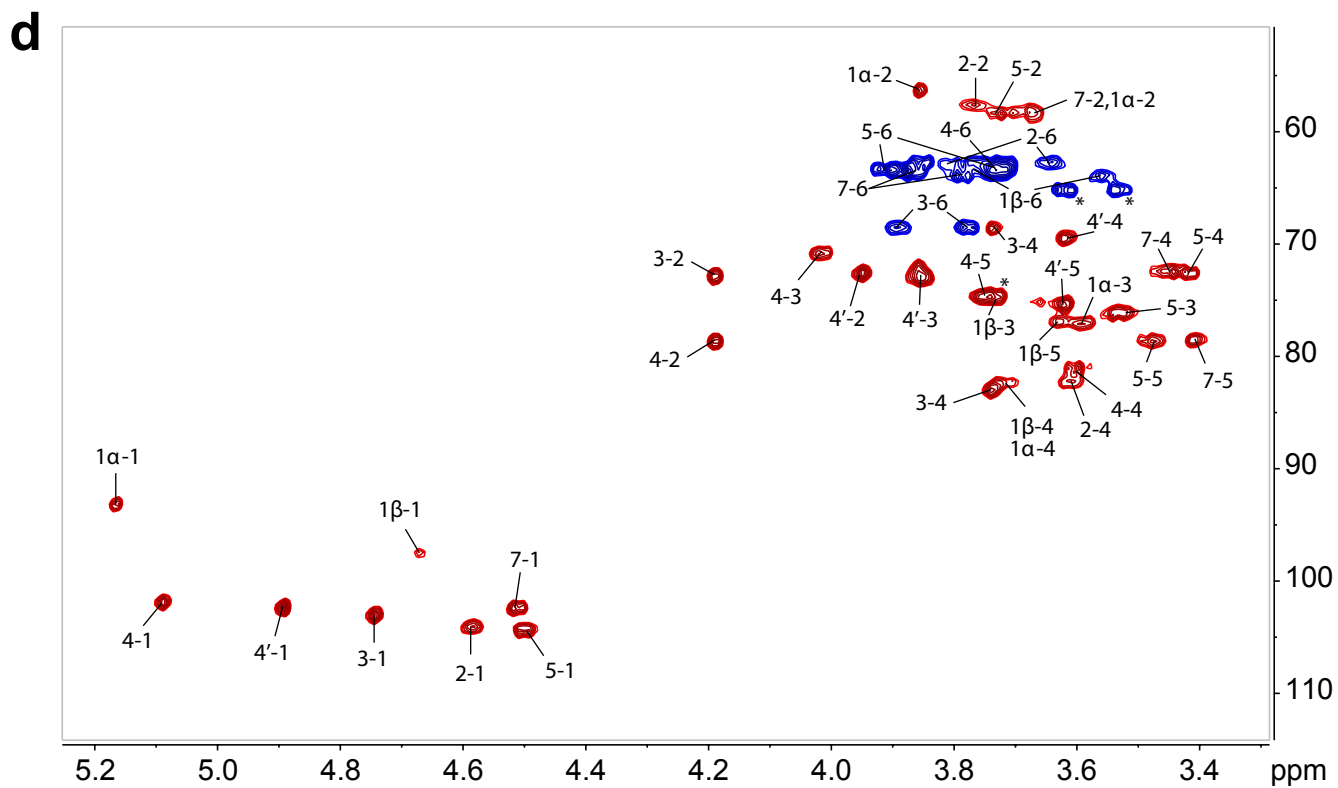

**Supplementary Figure 6.** (c) Partial  $^1\text{H}$ - $^1\text{H}$ -NOESY NMR spectrum of glycan **12**, acquired at 600 MHz and 30°C. Only the inter-residue correlations with H1 are labeled. (d) Partial  $^1\text{H}$ - $^{13}\text{C}$ -gradient HSQC NMR spectrum with multiplicity editing of glycan **12**, acquired at 600/150 MHz and 30°C. The signals labeled with asterisks are from contaminating glycerol.

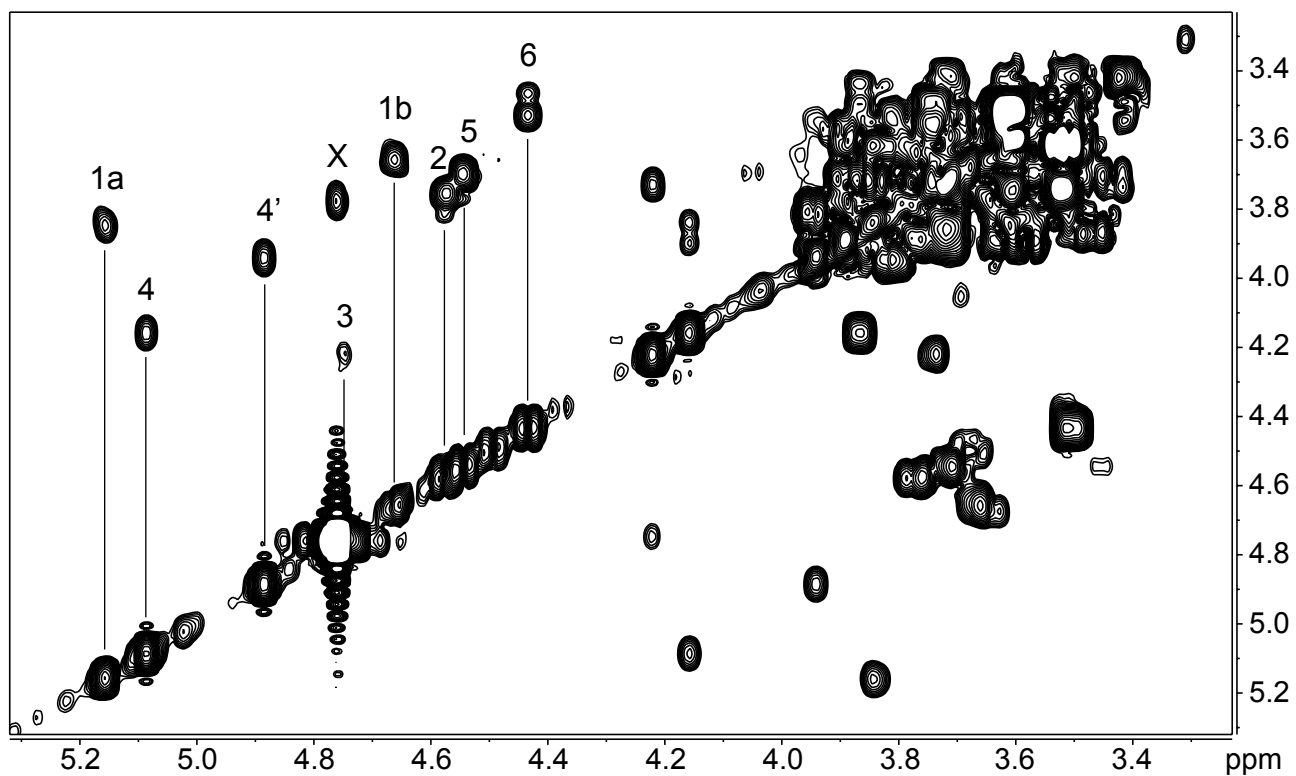

**Supplementary Figure 7.** Partial  $^1\text{H}$ - $^1\text{H}$ -gradient COSY NMR spectrum of glycan **10**, acquired at 600 MHz and 25°C. Only the H1-H2-correlations are labeled. The “X” marks an artifact, which is only present in the top half of the spectrum.
